# Supplementary material for: Tunable thickness and band structure of SnO sheets for improved photocatalytic activity
Source: Royal Society of Chemistry journal article supplement (doi:10.1039/c9ce01969c), 2020-01-01
Supplement: c9ce01969c1.pdf [file c9ce01969c1.pdf]

Supporting Information  
Tunable Thickness and Band Structure of SnO Sheets for Improved  
Photocatalytic Activity

Rui Zhang<sup>†a</sup>, Jianlei Kuang<sup>†a</sup>, Qipeng Lu<sup>a</sup>, Qi Wang<sup>a</sup>, Peng Sun<sup>a</sup>, Wenxiu Liu<sup>a</sup>, Shu  
Yin<sup>c</sup> and Wenbin Cao<sup>a, b\*</sup>

<sup>a</sup> Department of Inorganic Nonmetallic Materials, School of Materials Science and Engineering,  
University of Science and Technology Beijing, Beijing 100083, China

<sup>b</sup> Tianjin College, University of Science and Technology Beijing, Tianjin 301830, China

<sup>c</sup> Institute of Multidisciplinary Research for Advanced Materials, Tohoku University, 2-1-1,  
Katahira, Aoba-ku, Sendai 980-8577, JAPAN

Corresponding author: Prof. Dr. Wenbin Cao

Email: [wbcao@ustb.edu.cn](mailto:wbcdo@ustb.edu.cn)

[<sup>†</sup>] These authors contributed equally to this work

Table S1. PEG conditions of SnO samples preparation.

| sample    | PEG                | Hydrothermal condition |
|-----------|--------------------|------------------------|
| SnO-PEG-4 | 0.1695 g PEG-400   | 120 °C for 12 h        |
| SnO-PEG-5 | 0.1695 g PEG-600   | 120 °C for 12 h        |
| SnO-PEG-6 | 0.1695 g PEG-1540  | 120 °C for 12 h        |
| SnO-PEG-7 | 0.1695 g PEG-4000  | 120 °C for 12 h        |
| SnO-PEG-8 | 0.1695 g PEG-10000 | 120 °C for 12 h        |

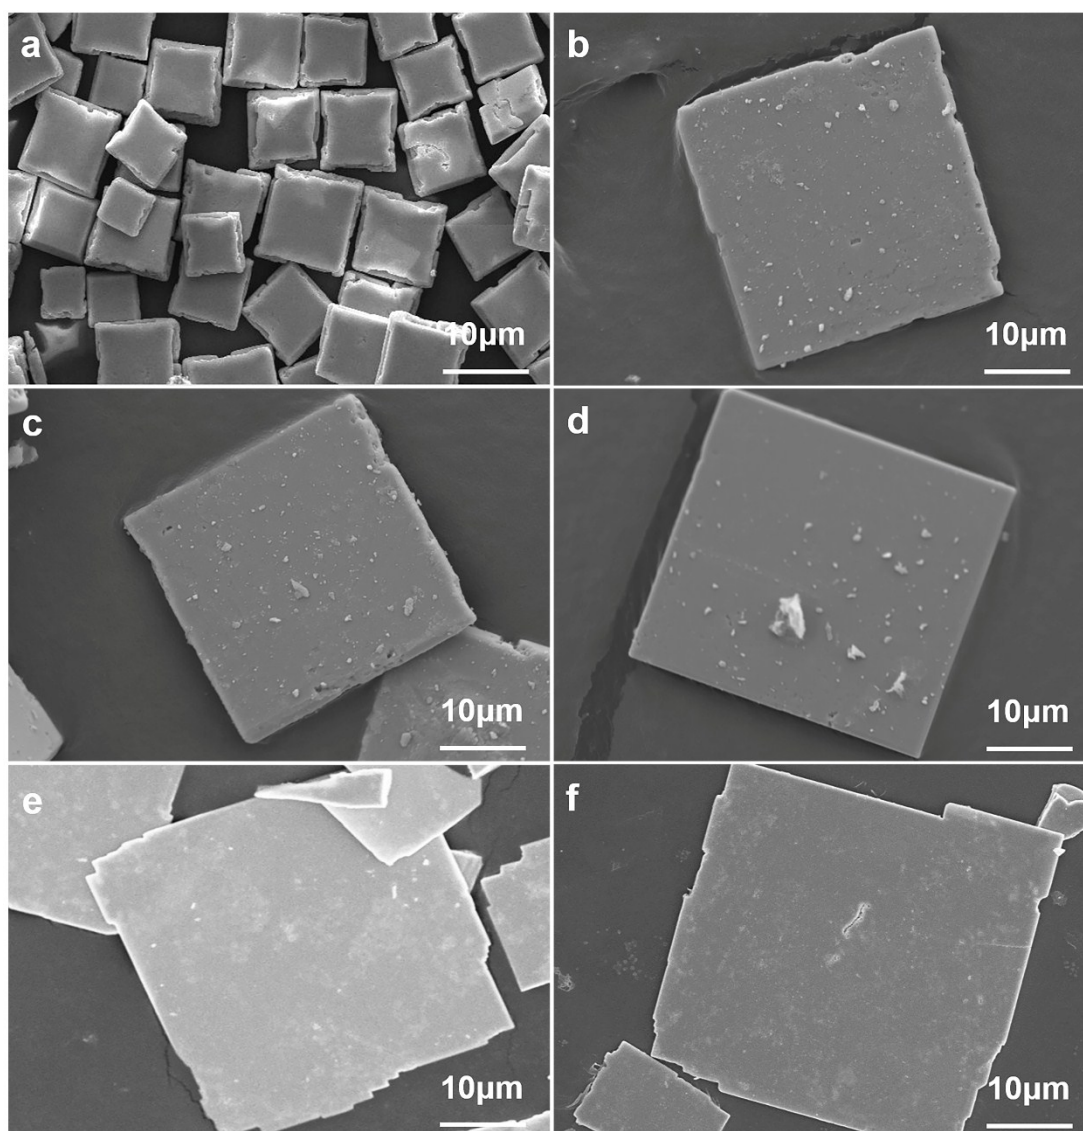

Fig. S1. SEM images of SnO samples prepared with different PEG. (a) Without PEG, (b) 5% PEG-400, (c) 5% PEG-600, (d) 5% PEG-1540, (e) 5% PEG-4000, (f) 5% PEG-10000.

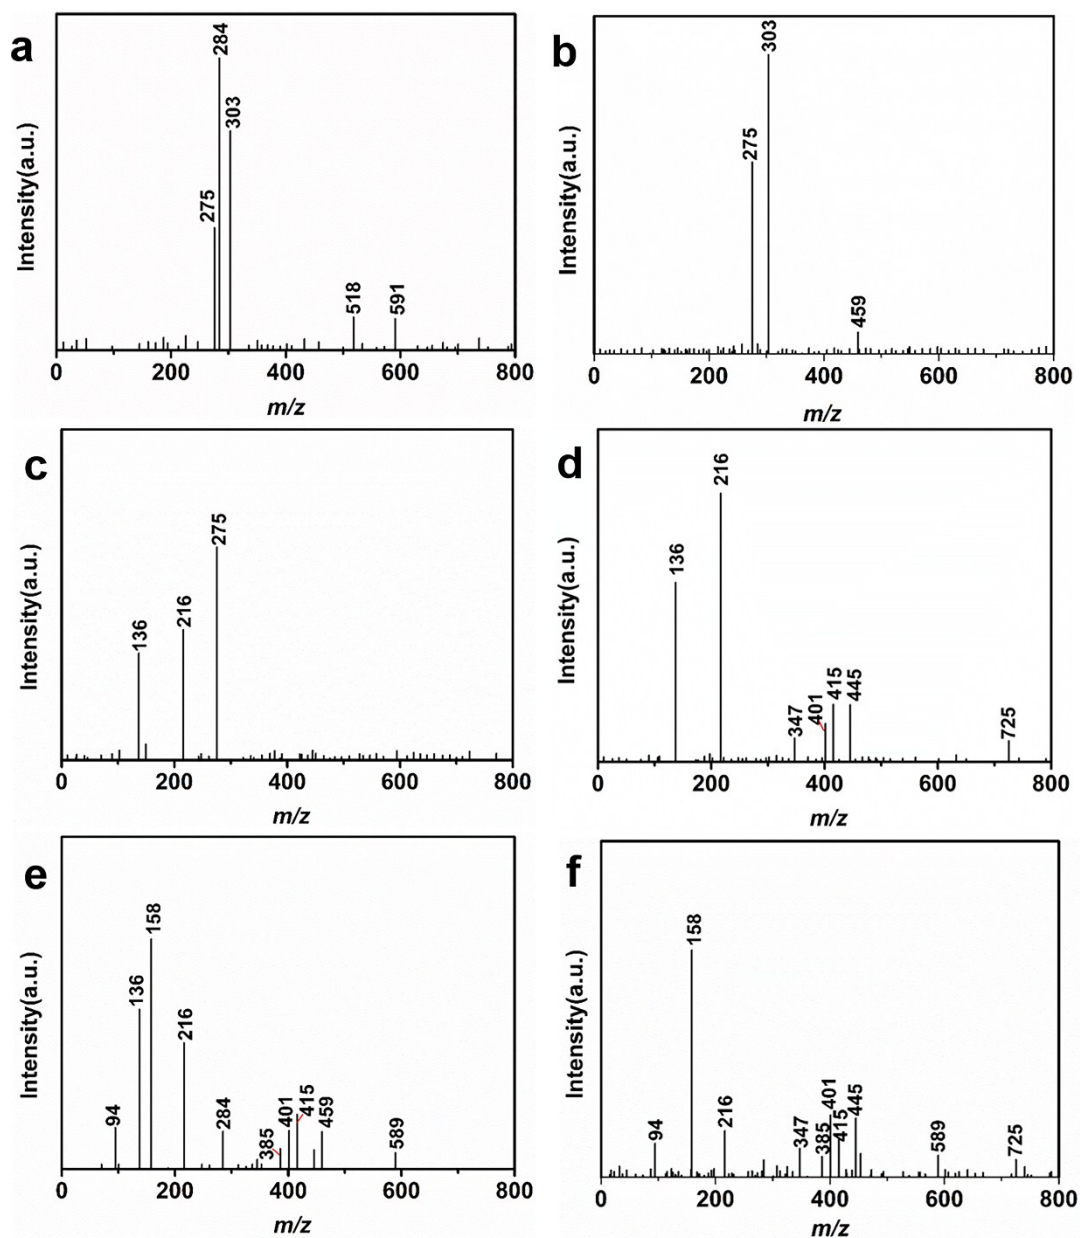

Fig. S2. MS spectra of degradation intermediates from MB by SnO sheets.

Table S2. The identified possible photocatalytic degradation intermediates of MB.

| m/z | Proposed structure |
|-----|--------------------|
| 303 |                    |
| 275 |                    |

|     |  |
|-----|--|
| 216 |  |
| 136 |  |
| 158 |  |
| 94  |  |

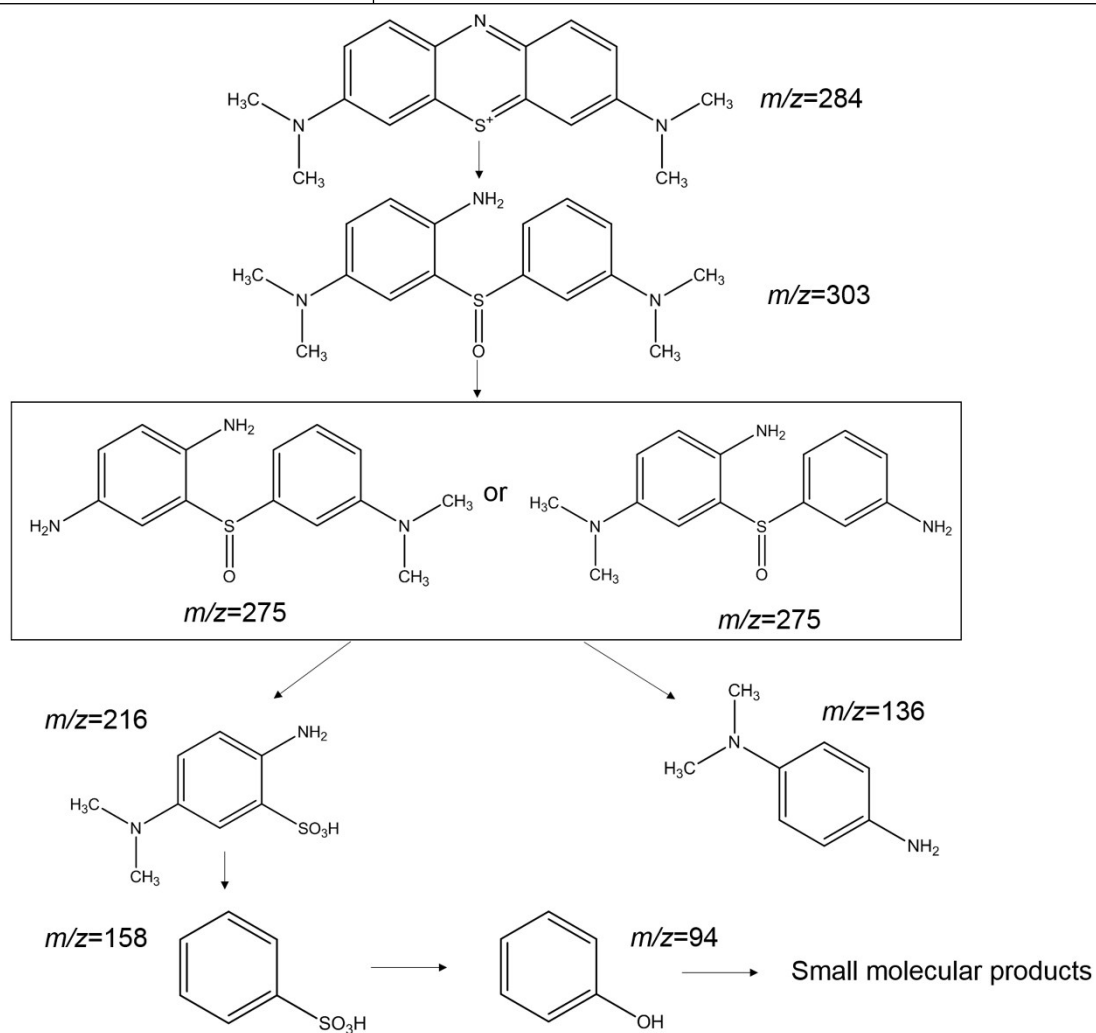

Fig. S3. Proposed photodegradation pathway of MB by SnO sheets.

Liquid chromatography-mass spectrometry (LC-MS) was employed to further determine the degradation intermediates during MB degradation process. Based on the LC-MS analysis (Fig. S2), 6 main intermediates were detected as shown in Table S2.

The intermediates were derived from ring sulfur atoms oxidation induced ring opening, demethylation and cleavage of C-N bond, which is similar with the result reported by Houas et al.<sup>1</sup> The possible photodegradation pathway of MB was proposed in Fig. S3. Specifically, Zhang et al.<sup>2, 3</sup> have investigated photocatalytic degradation process of MB in aqueous solution and suggested that the intermediates induced absorption peak blue-shifts were mainly produced through the demethylation reactions. Hence, before ring opening, the partial demethylation of MB also could be occurred.

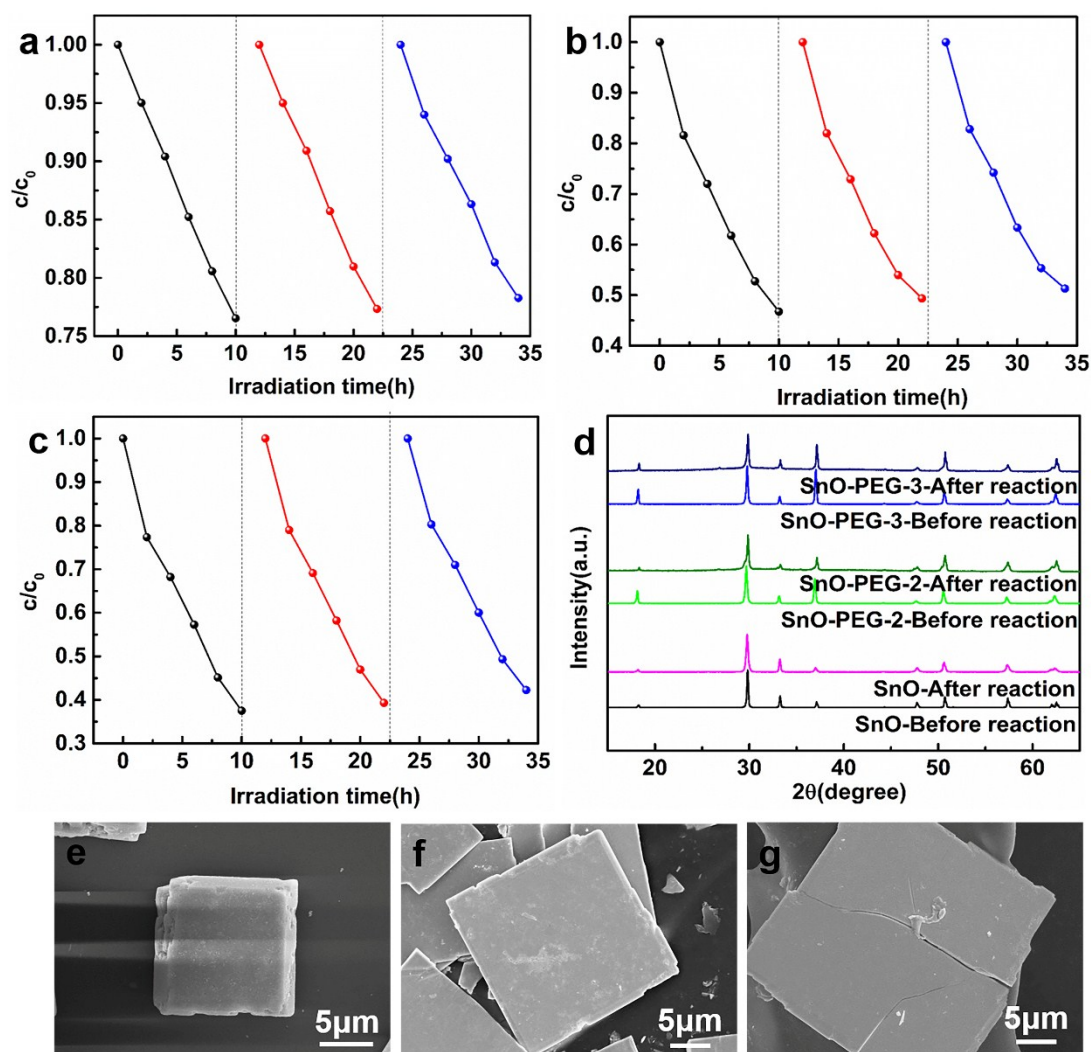

Fig. S4. Cycling test of photodegradation of MB in the present of (a) SnO, (b) SnO-PEG-2 and (c) SnO-PEG-3. (d) XRD patterns of SnO, SnO-PEG-2 and SnO-PEG-3 before and after cycling test. SEM images of (e) SnO, (f) SnO-PEG-2 and (g) SnO-PEG-3 after cycling test.

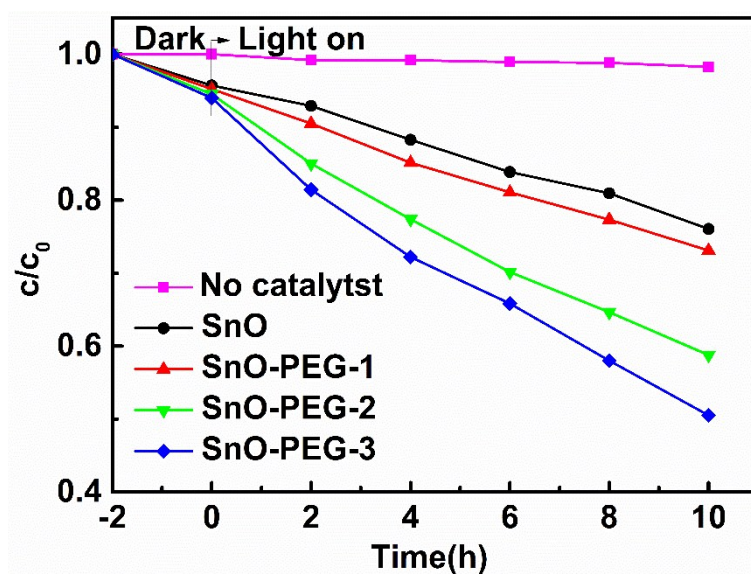

Fig. S5. Degradation curves of MO over different SnO sheets as photocatalysts.

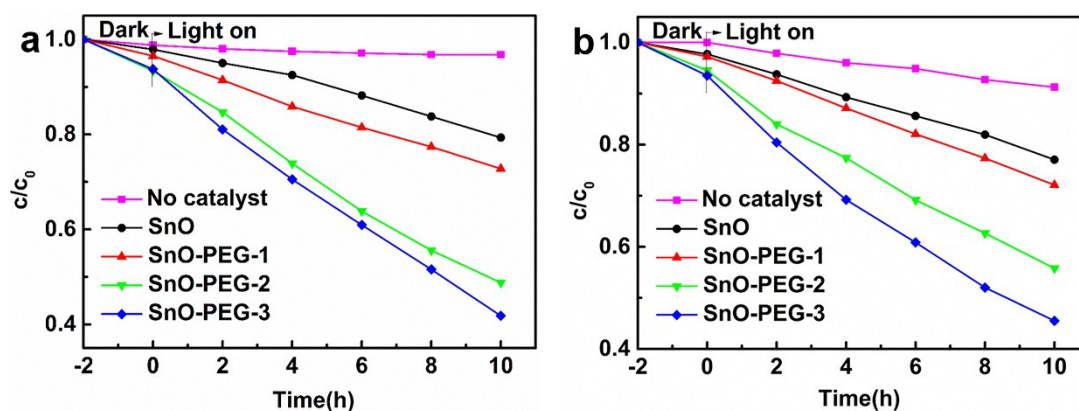

Fig. S6. Degradation curves of (a) TBO and (b) RhB over different SnO sheets as photocatalysts.

Table S3. Photocatalytic efficiency of SnO photocatalysts in previous reports.

| Photocatalysts | Light source         | Photocatalytic efficiency | Ref. |
|----------------|----------------------|---------------------------|------|
| SnO            | 200W tungsten lamp   | 50%, 12h for MB           | 4    |
| SnO            | 15W Hg lamp          | 82%, 10h for MB           | 5    |
| SnO            | 250W Hg lamp         | 100%, 4h for MO           | 6    |
| SnO            | 500W halogen lamp    | 5%, 2h for MB             | 7    |
| This work      | 15W fluorescent lamp | 70%, 10h for MB           |      |



## References

1. A. Houas, H. Lachheb, M. Ksibi, E. Elaloui, C. Guillard and J. M. Herrmann, *Appl. Catal., B: Environ.*, 2001, **31**, 145-157.
2. T. Y. Zhang, T. Oyama, A. Aoshima, H. Hidaka, J. C. Zhao and N. Serpone, *J. Photochem. Photobiol. A*, 2001, **140**, 163-172.
3. T. Y. Zhang, T. Oyama, S. Horikoshi, H. Hidaka, J. C. Zhao and N. Serpone, *Sol. Energy Mater. Sol. Cells*, 2002, **73**, 287-303.
4. A. K. Sinha, P. K. Manna, M. Pradhan, C. Mondal, S. M. Yusuf and T. Pal, *RSC Adv.*, 2014, **4**, 208-211.
5. W. Liu, L. Yin, R. Zhang, H. Yang, J. Ma and W. Cao, *Nanotechnology*, 2018, **29**, 284002.
6. Y. K. Cui, F. P. Wang, M. Z. Iqbal, Y. Li, A. M. Toufiq, Z. Y. Wang and S. Ali, *Cryst. Res. Technol.*, 2015, **50**, 210-214.
7. Q. Yan, J. Wang, X. Han and Z. Liu, *J. Mater. Res.*, 2013, **28**, 1862-1869.
